# Supplementary material
Source: PubMed Central journal article supplement (PMC2734323)
Supplement: btp373_1.pdf [file btp373_1.pdf]

**Supp. Table 1.** VarScan runtime on 454 and Illumina datasets

| Data Type | Samples/Lanes | Avg. Readlen | Mean (s) | Min (s) | Max (s) |
|-----------|---------------|--------------|----------|---------|---------|
| 454       | 42            | 220 bp       | 1,423    | 491     | 3,169   |
| Illumina  | 8             | 36 bp        | 1,625    | 749     | 2,298   |
