# Supplementary material
Source: PubMed Central journal article supplement (PMC2734323)
Supplement: btp373_2.pdf [file btp373_2.pdf]

**Supp. Table 2.** Comparison of SNP calling with other tools

| Dataset  | Algorithm           | SNPs | Detected | Sensitivity |
|----------|---------------------|------|----------|-------------|
| 454      | VarScan             | 359  | 359      | 100.00%     |
| 454      | Newbler (All Diffs) | 359  | 80       | 22.28%      |
| 454      | Newbler (HC Diffs)  | 359  | 79       | 22.01%      |
| Illumina | VarScan             | 359  | 344      | 95.82%      |
| Illumina | Maq                 | 359  | 340      | 94.71%      |
| Illumina | Maq SNPfilter       | 359  | 3        | 0.84%       |
