# Supplementary material
Source: PubMed Central journal article supplement (PMC2734323)
Supplement: btp373_3.pdf [file btp373_3.pdf]

**Supp. Table 3. SNPs detected in 454 and Illumina data**

| VarScan SNP Prediction (Individual 454 Sequencing) |           |      |     |     |     |     |          | Illumina Read Counts (VarScan) |           |           |
|----------------------------------------------------|-----------|------|-----|-----|-----|-----|----------|--------------------------------|-----------|-----------|
| Chrom                                              | Position  | Hs36 | Var | Ref | Het | Hom | 454_Freq | Ref_Reads                      | Var_Reads | Pool_Freq |
| chr1                                               | 19421930  | G    | C   | 25  | 15  | 2   | 0.226    | 3,473                          | 1,199     | 0.257     |
| chr1                                               | 19422451  | T    | C   | 29  | 11  | 2   | 0.179    | 5,052                          | 1,676     | 0.249     |
| chr1                                               | 19422576  | G    | A   | 41  | 1   | 0   | 0.012    | 12,999                         | 138       | 0.011     |
| chr1                                               | 19422624  | C    | T   | 41  | 1   | 0   | 0.012    | 11,092                         | 99        | 0.009     |
| chr1                                               | 19422687  | C    | T   | 41  | 1   | 0   | 0.012    | 5,843                          | 67        | 0.011     |
| chr1                                               | 19429868  | G    | C   | 35  | 7   | 0   | 0.083    | 2,227                          | 293       | 0.116     |
| chr1                                               | 19431662  | A    | G   | 41  | 1   | 0   | 0.012    | 2,811                          | 2         | 0.001     |
| chr1                                               | 19437237  | C    | G   | 25  | 15  | 2   | 0.226    | 8,330                          | 3,225     | 0.279     |
| chr1                                               | 19437837  | G    | A   | 41  | 1   | 0   | 0.012    | 4,478                          | 78        | 0.017     |
| chr1                                               | 19437925  | C    | T   | 32  | 9   | 1   | 0.131    | 4,733                          | 599       | 0.112     |
| chr1                                               | 19437931  | C    | G   | 16  | 19  | 7   | 0.393    | 3,175                          | 2,222     | 0.412     |
| chr1                                               | 19440079  | C    | T   | 41  | 1   | 0   | 0.012    | 13,967                         | 135       | 0.010     |
| chr1                                               | 19443013  | C    | G   | 30  | 12  | 0   | 0.143    | 3,020                          | 318       | 0.095     |
| chr1                                               | 148564816 | G    | A   | 40  | 2   | 0   | 0.024    | 2,571                          | 78        | 0.029     |
| chr1                                               | 148577451 | A    | C   | 38  | 4   | 0   | 0.048    | 11,588                         | 2,281     | 0.164     |
| chr1                                               | 148583200 | A    | G   | 37  | 5   | 0   | 0.060    | 4,444                          | 402       | 0.083     |
| chr1                                               | 148583712 | G    | A   | 41  | 1   | 0   | 0.012    | 5,979                          | 63        | 0.010     |
| chr1                                               | 148583713 | C    | A   | 41  | 1   | 0   | 0.012    | 6,215                          | 65        | 0.010     |
| chr1                                               | 148583810 | C    | T   | 41  | 1   | 0   | 0.012    | 5,215                          | 48        | 0.009     |
| chr1                                               | 148585705 | T    | A   | 27  | 13  | 2   | 0.202    | 6,280                          | 1,930     | 0.235     |
| chr1                                               | 148591855 | A    | G   | 40  | 2   | 0   | 0.024    | 2,937                          | 96        | 0.032     |
| chr1                                               | 148591950 | G    | A   | 41  | 1   | 0   | 0.012    | 1,091                          | 36        | 0.032     |
| chr1                                               | 154390044 | G    | A   | 41  | 1   | 0   | 0.012    | 11,753                         | 159       | 0.013     |
| chr1                                               | 154394961 | G    | A   | 40  | 2   | 0   | 0.024    | 4,299                          | 51        | 0.012     |
| chr1                                               | 154397249 | C    | G   | 41  | 1   | 0   | 0.012    | 7,458                          | 103       | 0.014     |
| chr1                                               | 154411595 | G    | A   | 41  | 1   | 0   | 0.012    | 3,014                          | 43        | 0.014     |
| chr1                                               | 154412193 | G    | A   | 41  | 1   | 0   | 0.012    | 4,477                          | 41        | 0.009     |
| chr1                                               | 154413264 | G    | A   | 33  | 9   | 0   | 0.107    | 3,452                          | 424       | 0.109     |
| chr1                                               | 154413950 | T    | C   | 25  | 15  | 2   | 0.226    | 2,825                          | 1,011     | 0.264     |
| chr1                                               | 195674759 | C    | T   | 41  | 1   | 0   | 0.012    | 3,072                          | 43        | 0.014     |
| chr1                                               | 195675237 | G    | A   | 0   | 0   | 42  | 1.000    | 227                            | 13,695    | 0.984     |
| chr1                                               | 195675258 | G    | A   | 41  | 1   | 0   | 0.012    | 13,715                         | 142       | 0.010     |
| chr1                                               | 195675283 | C    | T   | 25  | 16  | 1   | 0.214    | 10,822                         | 2,870     | 0.210     |
| chr1                                               | 195713660 | T    | C   | 36  | 6   | 0   | 0.071    | 3,642                          | 278       | 0.071     |
| chr1                                               | 226002144 | C    | G   | 41  | 1   | 0   | 0.012    | 3,597                          | 57        | 0.016     |
| chr1                                               | 226013448 | A    | T   | 41  | 1   | 0   | 0.012    | 4,618                          | 65        | 0.014     |
| chr1                                               | 226030114 | G    | T   | 35  | 5   | 2   | 0.107    | 2,985                          | 405       | 0.119     |
| chr1                                               | 226035419 | C    | T   | 41  | 1   | 0   | 0.012    | 5,727                          | 103       | 0.018     |
| chr11                                              | 61475963  | T    | C   | 18  | 18  | 6   | 0.357    | 6,606                          | 3,966     | 0.375     |
| chr11                                              | 61486612  | G    | A   | 25  | 13  | 4   | 0.250    | 2,687                          | 1,485     | 0.356     |
| chr11                                              | 61486759  | C    | T   | 27  | 13  | 2   | 0.202    | 4,730                          | 1,150     | 0.196     |
| chr11                                              | 61486810  | T    | C   | 17  | 16  | 9   | 0.405    | 2,070                          | 1,664     | 0.446     |
| chr11                                              | 61486990  | C    | A   | 41  | 1   | 0   | 0.012    | 2,764                          | 21        | 0.008     |

|       |           |   |   |    |    |    |       |        |        |       |
|-------|-----------|---|---|----|----|----|-------|--------|--------|-------|
| chr11 | 61487003  | G | T | 41 | 1  | 0  | 0.012 | 2,742  | 22     | 0.008 |
| chr11 | 61488553  | G | A | 41 | 1  | 0  | 0.012 | 3,319  | 91     | 0.027 |
| chr11 | 62137308  | T | C | 0  | 3  | 39 | 0.964 | 149    | 2,183  | 0.936 |
| chr11 | 62138384  | G | C | 40 | 0  | 2  | 0.048 | 9,148  | 316    | 0.033 |
| chr11 | 62138401  | G | A | 41 | 1  | 0  | 0.012 | 11,720 | 37     | 0.003 |
| chr11 | 62138854  | A | C | 31 | 11 | 0  | 0.131 | 2,384  | 1      | 0.000 |
| chr11 | 62138974  | A | G | 39 | 3  | 0  | 0.036 | 2,131  | 8      | 0.004 |
| chr11 | 118718992 | A | T | 35 | 7  | 0  | 0.083 | 7,059  | 1,272  | 0.153 |
| chr11 | 118719704 | A | T | 41 | 1  | 0  | 0.012 | 7,488  | 2      | 0.000 |
| chr11 | 118720256 | C | T | 41 | 1  | 0  | 0.012 | 12,390 | 68     | 0.005 |
| chr11 | 118720463 | G | C | 11 | 16 | 15 | 0.548 | 3,700  | 4,861  | 0.568 |
| chr11 | 118720466 | C | T | 13 | 17 | 12 | 0.488 | 4,410  | 5,059  | 0.534 |
| chr11 | 118720548 | G | A | 41 | 1  | 0  | 0.012 | 11,351 | 245    | 0.021 |
| chr11 | 118721331 | G | A | 40 | 2  | 0  | 0.024 | 13,657 | 409    | 0.029 |
| chr11 | 118721352 | C | A | 41 | 1  | 0  | 0.012 | 12,452 | 160    | 0.013 |
| chr11 | 118721441 | A | G | 1  | 3  | 38 | 0.940 | 1,314  | 14,994 | 0.919 |
| chr11 | 118721489 | G | A | 29 | 13 | 0  | 0.155 | 12,154 | 2,547  | 0.173 |
| chr11 | 118722464 | C | T | 9  | 17 | 16 | 0.583 | 1,193  | 1,666  | 0.583 |
| chr11 | 118722665 | C | T | 12 | 14 | 16 | 0.548 | 998    | 1,549  | 0.608 |
| chr12 | 107563709 | T | G | 41 | 1  | 0  | 0.012 | 4,916  | 47     | 0.009 |
| chr12 | 107565386 | T | C | 41 | 0  | 1  | 0.024 | 3,451  | 85     | 0.024 |
| chr12 | 107572318 | G | T | 41 | 1  | 0  | 0.012 | 8,854  | 14     | 0.002 |
| chr13 | 27490546  | T | C | 31 | 10 | 1  | 0.143 | 2,532  | 382    | 0.131 |
| chr13 | 27495449  | C | A | 41 | 1  | 0  | 0.012 | 4,962  | 42     | 0.008 |
| chr13 | 27495449  | C | T | 39 | 3  | 0  | 0.036 | 4,962  | 142    | 0.028 |
| chr13 | 27505989  | T | G | 7  | 10 | 25 | 0.714 | 1,052  | 2,766  | 0.724 |
| chr13 | 27507935  | T | C | 41 | 1  | 0  | 0.012 | 2,828  | 50     | 0.017 |
| chr13 | 27507991  | T | C | 6  | 13 | 23 | 0.702 | 982    | 2,323  | 0.703 |
| chr13 | 27507997  | T | C | 5  | 12 | 25 | 0.738 | 983    | 2,422  | 0.711 |
| chr13 | 27521699  | G | T | 39 | 3  | 0  | 0.036 | 4,949  | 437    | 0.081 |
| chr13 | 27521759  | C | T | 36 | 6  | 0  | 0.071 | 5,010  | 429    | 0.079 |
| chr13 | 27542830  | A | G | 34 | 6  | 2  | 0.119 | 3,829  | 608    | 0.137 |
| chr13 | 27545534  | T | G | 39 | 3  | 0  | 0.036 | 18,158 | 844    | 0.044 |
| chr13 | 27545573  | C | A | 41 | 1  | 0  | 0.012 | 12,382 | 7      | 0.001 |
| chr13 | 27545573  | C | T | 36 | 4  | 2  | 0.095 | 12,382 | 1,870  | 0.131 |
| chr14 | 20832643  | A | T | 41 | 1  | 0  | 0.012 | 12,155 | 4      | 0.000 |
| chr14 | 20832821  | C | G | 41 | 1  | 0  | 0.012 | 7,819  | 165    | 0.021 |
| chr14 | 20863299  | C | T | 40 | 2  | 0  | 0.024 | 2,435  | 35     | 0.014 |
| chr14 | 20866624  | G | C | 32 | 10 | 0  | 0.119 | 1,567  | 432    | 0.216 |
| chr14 | 20881020  | C | T | 41 | 1  | 0  | 0.012 | 14,248 | 145    | 0.010 |
| chr14 | 20881142  | C | T | 41 | 1  | 0  | 0.012 | 19,886 | 190    | 0.009 |
| chr14 | 20889304  | G | C | 41 | 1  | 0  | 0.012 | 3,309  | 22     | 0.007 |
| chr14 | 23619451  | C | G | 40 | 2  | 0  | 0.024 | 7,179  | 267    | 0.036 |
| chr14 | 23620064  | C | T | 20 | 9  | 13 | 0.417 | 2,073  | 2,946  | 0.587 |
| chr14 | 23653952  | G | T | 40 | 2  | 0  | 0.024 | 3,644  | 69     | 0.019 |
| chr14 | 67261538  | A | G | 40 | 2  | 0  | 0.024 | 11,206 | 286    | 0.025 |

|       |           |   |   |    |    |    |       |        |        |       |
|-------|-----------|---|---|----|----|----|-------|--------|--------|-------|
| chr14 | 67263484  | G | A | 33 | 8  | 1  | 0.119 | 4,058  | 920    | 0.185 |
| chr14 | 103056008 | C | T | 15 | 17 | 10 | 0.440 | 2,127  | 1,314  | 0.382 |
| chr14 | 103056018 | A | G | 41 | 1  | 0  | 0.012 | 3,562  | 65     | 0.018 |
| chr15 | 69893507  | C | T | 41 | 1  | 0  | 0.012 | 2,930  | 38     | 0.013 |
| chr15 | 69893603  | A | G | 41 | 1  | 0  | 0.012 | 4,860  | 6      | 0.001 |
| chr17 | 1501377   | G | C | 41 | 1  | 0  | 0.012 | 4,790  | 64     | 0.013 |
| chr17 | 1501386   | C | T | 38 | 4  | 0  | 0.048 | 4,189  | 362    | 0.080 |
| chr17 | 1506676   | C | G | 41 | 1  | 0  | 0.012 | 2,102  | 21     | 0.010 |
| chr17 | 1508221   | G | A | 41 | 1  | 0  | 0.012 | 4,919  | 78     | 0.016 |
| chr17 | 1508257   | A | C | 41 | 1  | 0  | 0.012 | 3,593  | 57     | 0.016 |
| chr17 | 1509985   | G | A | 41 | 1  | 0  | 0.012 | 4,069  | 5      | 0.001 |
| chr17 | 1510422   | A | G | 32 | 10 | 0  | 0.119 | 745    | 15     | 0.020 |
| chr17 | 1510635   | C | T | 41 | 1  | 0  | 0.012 | 10,391 | 125    | 0.012 |
| chr17 | 1510639   | A | C | 40 | 2  | 0  | 0.024 | 10,703 | 274    | 0.025 |
| chr17 | 1511042   | A | G | 41 | 1  | 0  | 0.012 | 3,144  | 18     | 0.006 |
| chr17 | 1511961   | T | C | 40 | 2  | 0  | 0.024 | 5,722  | 172    | 0.029 |
| chr17 | 1512033   | C | T | 41 | 1  | 0  | 0.012 | 7,006  | 91     | 0.013 |
| chr17 | 1512211   | A | G | 37 | 5  | 0  | 0.060 | 6,691  | 796    | 0.106 |
| chr17 | 1525689   | C | T | 27 | 13 | 2  | 0.202 | 9,679  | 2,452  | 0.202 |
| chr17 | 1527524   | T | C | 41 | 1  | 0  | 0.012 | 3,544  | 28     | 0.008 |
| chr17 | 1527679   | G | C | 29 | 11 | 2  | 0.179 | 3,774  | 855    | 0.185 |
| chr17 | 1527840   | G | A | 41 | 1  | 0  | 0.012 | 3,939  | 56     | 0.014 |
| chr17 | 1528955   | G | A | 29 | 11 | 2  | 0.179 | 2,682  | 820    | 0.234 |
| chr17 | 1530882   | T | C | 41 | 1  | 0  | 0.012 | 6,305  | 100    | 0.016 |
| chr17 | 1531074   | A | G | 27 | 13 | 2  | 0.202 | 2,403  | 746    | 0.237 |
| chr17 | 1531880   | A | G | 33 | 8  | 1  | 0.119 | 2,562  | 689    | 0.212 |
| chr17 | 1532155   | T | G | 38 | 4  | 0  | 0.048 | 3,194  | 95     | 0.029 |
| chr17 | 1532372   | T | C | 41 | 1  | 0  | 0.012 | 2,607  | 11     | 0.004 |
| chr17 | 1533785   | C | G | 41 | 1  | 0  | 0.012 | 2,359  | 42     | 0.017 |
| chr17 | 6268113   | G | A | 35 | 7  | 0  | 0.083 | 3,894  | 486    | 0.111 |
| chr17 | 6268215   | C | T | 33 | 9  | 0  | 0.107 | 2,553  | 349    | 0.120 |
| chr17 | 6268265   | G | A | 41 | 1  | 0  | 0.012 | 3,796  | 35     | 0.009 |
| chr17 | 6268267   | G | A | 40 | 2  | 0  | 0.024 | 3,636  | 92     | 0.025 |
| chr17 | 6268275   | G | A | 27 | 11 | 4  | 0.226 | 2,587  | 754    | 0.226 |
| chr17 | 6268302   | G | A | 41 | 0  | 1  | 0.024 | 2,059  | 130    | 0.059 |
| chr17 | 6268326   | G | A | 41 | 1  | 0  | 0.012 | 1,469  | 38     | 0.025 |
| chr17 | 6269688   | C | A | 40 | 2  | 0  | 0.024 | 7,450  | 198    | 0.026 |
| chr17 | 6270678   | A | G | 41 | 1  | 0  | 0.012 | 8,569  | 275    | 0.031 |
| chr17 | 6270792   | T | C | 6  | 10 | 26 | 0.738 | 537    | 6,204  | 0.920 |
| chr17 | 6270833   | G | A | 23 | 15 | 4  | 0.274 | 2,396  | 3,705  | 0.607 |
| chr17 | 6271127   | A | G | 37 | 3  | 2  | 0.083 | 12,999 | 1,472  | 0.102 |
| chr17 | 6279008   | A | G | 41 | 1  | 0  | 0.012 | 12,060 | 129    | 0.011 |
| chr17 | 6279254   | G | T | 37 | 5  | 0  | 0.060 | 9,322  | 1,175  | 0.112 |
| chr17 | 6305477   | A | G | 0  | 10 | 32 | 0.881 | 1,717  | 13,247 | 0.885 |
| chr17 | 6305605   | T | C | 35 | 7  | 0  | 0.083 | 11,159 | 1,082  | 0.088 |
| chr17 | 6308857   | G | C | 41 | 1  | 0  | 0.012 |        |        |       |

|       |          |   |   |    |    |    |       |        |        |       |
|-------|----------|---|---|----|----|----|-------|--------|--------|-------|
| chr17 | 6314285  | G | A | 40 | 2  | 0  | 0.024 | 9,014  | 180    | 0.020 |
| chr17 | 6314461  | C | T | 10 | 19 | 13 | 0.536 | 5,124  | 6,962  | 0.576 |
| chr17 | 6314504  | C | T | 41 | 1  | 0  | 0.012 | 12,584 | 166    | 0.013 |
| chr17 | 6318389  | C | T | 41 | 1  | 0  | 0.012 | 10,764 | 134    | 0.012 |
| chr17 | 6318392  | C | A | 15 | 20 | 7  | 0.405 | 5,732  | 4,707  | 0.451 |
| chr17 | 6318555  | A | G | 41 | 1  | 0  | 0.012 | 12,394 | 249    | 0.020 |
| chr17 | 6322663  | G | A | 8  | 13 | 21 | 0.655 | 1,041  | 1,976  | 0.655 |
| chr17 | 6327671  | G | A | 41 | 1  | 0  | 0.012 | 3,070  | 67     | 0.021 |
| chr17 | 6328206  | G | C | 7  | 14 | 21 | 0.667 | 1,095  | 2,520  | 0.697 |
| chr17 | 6347455  | T | C | 15 | 22 | 5  | 0.381 | 2,436  | 1,208  | 0.332 |
| chr17 | 6347607  | C | T | 21 | 15 | 6  | 0.321 | 2,778  | 2,198  | 0.442 |
| chr17 | 6381931  | C | T | 25 | 15 | 2  | 0.226 | 15,527 | 5,651  | 0.267 |
| chr17 | 6382100  | G | A | 33 | 8  | 1  | 0.119 | 17,051 | 2,585  | 0.132 |
| chr17 | 7850498  | G | A | 38 | 4  | 0  | 0.048 | 8,850  | 676    | 0.071 |
| chr17 | 7851573  | T | A | 41 | 1  | 0  | 0.012 | 12,160 | 7      | 0.001 |
| chr17 | 7858844  | G | T | 33 | 9  | 0  | 0.107 | 2,663  | 307    | 0.103 |
| chr17 | 7858848  | G | C | 41 | 1  | 0  | 0.012 | 2,923  | 34     | 0.011 |
| chr17 | 7858871  | C | T | 34 | 8  | 0  | 0.095 | 2,868  | 315    | 0.099 |
| chr17 | 23898022 | G | T | 33 | 8  | 1  | 0.119 | 2,556  | 3      | 0.001 |
| chr17 | 23898370 | G | A | 41 | 1  | 0  | 0.012 | 5,392  | 64     | 0.012 |
| chr17 | 55589622 | C | T | 41 | 1  | 0  | 0.012 | 11,495 | 93     | 0.008 |
| chr17 | 77110200 | C | T | 41 | 1  | 0  | 0.012 | 1,688  | 32     | 0.019 |
| chr17 | 77110461 | G | A | 41 | 1  | 0  | 0.012 | 1,292  | 18     | 0.014 |
| chr17 | 77111406 | T | C | 41 | 1  | 0  | 0.012 | 4,571  | 209    | 0.044 |
| chr17 | 77111540 | C | T | 41 | 1  | 0  | 0.012 |        |        |       |
| chr17 | 77111631 | C | A | 29 | 13 | 0  | 0.155 |        |        |       |
| chr17 | 77111632 | T | C | 41 | 1  | 0  | 0.012 |        |        |       |
| chr17 | 77111711 | G | A | 41 | 1  | 0  | 0.012 | 1,343  | 6      | 0.004 |
| chr17 | 77113830 | G | A | 41 | 1  | 0  | 0.012 | 4,383  | 111    | 0.025 |
| chr17 | 77113877 | G | A | 40 | 2  | 0  | 0.024 | 5,601  | 194    | 0.033 |
| chr19 | 12798227 | G | C | 39 | 3  | 0  | 0.036 | 6,412  | 4      | 0.001 |
| chr19 | 12800792 | T | C | 10 | 14 | 18 | 0.595 | 9,325  | 13,969 | 0.600 |
| chr19 | 53016999 | T | C | 36 | 4  | 2  | 0.095 | 13,228 | 1,447  | 0.099 |
| chr19 | 53029624 | C | T | 31 | 10 | 1  | 0.143 | 3,012  | 686    | 0.186 |
| chr19 | 53029709 | G | A | 32 | 9  | 1  | 0.131 | 2,595  | 521    | 0.167 |
| chr19 | 53034608 | G | A | 39 | 2  | 1  | 0.048 | 1,716  | 106    | 0.058 |
| chr19 | 53035436 | A | T | 29 | 8  | 5  | 0.214 | 7,431  | 3,670  | 0.331 |
| chr19 | 53035437 | A | C | 28 | 9  | 5  | 0.226 | 7,408  | 3,611  | 0.328 |
| chr19 | 53036325 | G | A | 35 | 6  | 1  | 0.095 | 13,710 | 2,802  | 0.170 |
| chr19 | 53036382 | G | A | 19 | 18 | 5  | 0.333 | 9,129  | 4,494  | 0.330 |
| chr19 | 53036491 | T | A | 11 | 15 | 16 | 0.560 | 3,677  | 6,921  | 0.653 |
| chr19 | 53036828 | C | T | 40 | 2  | 0  | 0.024 | 5,112  | 188    | 0.035 |
| chr19 | 53037142 | C | T | 18 | 19 | 5  | 0.345 | 3,693  | 2,074  | 0.360 |
| chr19 | 53037207 | C | T | 34 | 7  | 1  | 0.107 | 3,310  | 562    | 0.145 |
| chr19 | 53037219 | T | C | 11 | 14 | 17 | 0.571 | 1,456  | 2,040  | 0.584 |
| chr19 | 53038206 | G | A | 41 | 1  | 0  | 0.012 | 6,639  | 55     | 0.008 |

|       |           |   |   |    |    |    |       |        |       |       |
|-------|-----------|---|---|----|----|----|-------|--------|-------|-------|
| chr19 | 59317779  | G | A | 41 | 1  | 0  | 0.012 | 4,596  | 47    | 0.010 |
| chr19 | 59317819  | C | T | 38 | 4  | 0  | 0.048 | 3,524  | 140   | 0.038 |
| chr19 | 59317866  | T | C | 34 | 7  | 1  | 0.107 | 2,508  | 389   | 0.134 |
| chr19 | 59317867  | C | G | 24 | 15 | 3  | 0.250 | 1,948  | 921   | 0.321 |
| chr19 | 59318585  | A | G | 41 | 1  | 0  | 0.012 | 14,568 | 43    | 0.003 |
| chr3  | 50207957  | G | A | 32 | 10 | 0  | 0.119 | 794    | 2     | 0.003 |
| chr3  | 50208219  | T | G | 18 | 14 | 10 | 0.405 | 1,924  | 1,346 | 0.412 |
| chr3  | 50208321  | C | T | 25 | 14 | 3  | 0.238 | 1,661  | 1,046 | 0.386 |
| chr3  | 130735294 | C | A | 35 | 7  | 0  | 0.083 | 8,680  | 1,566 | 0.153 |
| chr3  | 130735483 | A | G | 37 | 3  | 2  | 0.083 | 26,721 | 2,686 | 0.091 |
| chr3  | 130735564 | C | T | 39 | 3  | 0  | 0.036 | 19,984 | 723   | 0.035 |
| chr3  | 130735739 | T | C | 41 | 1  | 0  | 0.012 | 2,235  | 21    | 0.009 |
| chr3  | 130735995 | G | T | 41 | 1  | 0  | 0.012 | 5,768  | 286   | 0.047 |
| chr3  | 130736163 | A | G | 29 | 9  | 4  | 0.202 | 1,820  | 635   | 0.259 |
| chr3  | 130736176 | T | C | 41 | 1  | 0  | 0.012 | 2,100  | 107   | 0.048 |
| chr4  | 619829    | G | C | 41 | 1  | 0  | 0.012 | 10,609 | 307   | 0.028 |
| chr4  | 639680    | G | C | 41 | 1  | 0  | 0.012 | 5,409  | 17    | 0.003 |
| chr4  | 639692    | C | T | 41 | 1  | 0  | 0.012 | 5,445  | 71    | 0.013 |
| chr4  | 639876    | C | T | 30 | 10 | 2  | 0.167 | 4,883  | 1,086 | 0.182 |
| chr4  | 642826    | C | T | 38 | 4  | 0  | 0.048 | 4,901  | 237   | 0.046 |
| chr4  | 645881    | C | G | 30 | 11 | 1  | 0.155 | 10,543 | 2,051 | 0.163 |
| chr4  | 648089    | G | A | 30 | 11 | 1  | 0.155 | 9,846  | 2,380 | 0.195 |
| chr4  | 654310    | C | T | 41 | 1  | 0  | 0.012 | 568    | 7     | 0.012 |
| chr4  | 15579299  | G | C | 3  | 7  | 32 | 0.845 | 858    | 4,229 | 0.831 |
| chr4  | 15595140  | G | A | 0  | 1  | 41 | 0.988 | 67     | 4,633 | 0.986 |
| chr4  | 15596610  | T | A | 4  | 19 | 19 | 0.679 | 464    | 437   | 0.485 |
| chr4  | 15598289  | C | A | 36 | 0  | 6  | 0.143 | 156    | 170   | 0.521 |
| chr4  | 15598289  | C | T | 3  | 1  | 38 | 0.917 | 156    | 2,032 | 0.929 |
| chr4  | 15604616  | C | T | 41 | 1  | 0  | 0.012 | 2,593  | 30    | 0.011 |
| chr4  | 15604681  | G | A | 41 | 1  | 0  | 0.012 | 3,340  | 21    | 0.006 |
| chr4  | 15619667  | C | T | 41 | 1  | 0  | 0.012 | 4,462  | 58    | 0.013 |
| chr4  | 15623834  | C | A | 39 | 2  | 1  | 0.048 | 2,588  | 153   | 0.056 |
| chr4  | 15626996  | T | G | 38 | 4  | 0  | 0.048 | 14,927 | 771   | 0.049 |
| chr4  | 15629260  | C | T | 31 | 9  | 2  | 0.155 | 3,764  | 752   | 0.167 |
| chr4  | 15633983  | A | G | 2  | 12 | 28 | 0.810 | 866    | 3,788 | 0.814 |
| chr4  | 15634951  | A | G | 32 | 8  | 2  | 0.143 | 14,752 | 3,068 | 0.172 |
| chr4  | 15635093  | A | G | 41 | 1  | 0  | 0.012 | 15,272 | 127   | 0.008 |
| chr4  | 15635794  | C | T | 41 | 1  | 0  | 0.012 | 5,391  | 76    | 0.014 |
| chr4  | 15635833  | T | C | 41 | 1  | 0  | 0.012 | 4,561  | 35    | 0.008 |
| chr4  | 15635867  | A | C | 38 | 4  | 0  | 0.048 | 4,356  | 5     | 0.001 |
| chr4  | 15635874  | A | T | 41 | 1  | 0  | 0.012 | 4,760  | 1     | 0.000 |
| chr4  | 15635875  | T | A | 40 | 2  | 0  | 0.024 |        |       |       |
| chr4  | 15636081  | T | C | 37 | 5  | 0  | 0.060 | 4,438  | 464   | 0.095 |
| chr4  | 15646450  | C | T | 16 | 17 | 9  | 0.417 | 4,781  | 4,411 | 0.480 |
| chr4  | 15649715  | C | T | 41 | 1  | 0  | 0.012 | 3,687  | 24    | 0.006 |
| chr4  | 15686499  | G | A | 38 | 4  | 0  | 0.048 | 3,263  | 172   | 0.050 |

|      |          |   |   |    |    |    |       |        |       |       |
|------|----------|---|---|----|----|----|-------|--------|-------|-------|
| chr4 | 15686613 | G | A | 40 | 2  | 0  | 0.024 | 2,286  | 81    | 0.034 |
| chr4 | 15686906 | G | A | 8  | 9  | 25 | 0.702 | 1,083  | 3,676 | 0.772 |
| chr5 | 43281679 | C | T | 21 | 18 | 3  | 0.286 | 1,555  | 790   | 0.337 |
| chr5 | 43281716 | G | A | 41 | 1  | 0  | 0.012 |        |       |       |
| chr5 | 43312832 | A | G | 40 | 2  | 0  | 0.024 | 3,248  | 4     | 0.001 |
| chr6 | 42231231 | T | C | 41 | 1  | 0  | 0.012 | 16,302 | 224   | 0.014 |
| chr6 | 42231295 | A | C | 4  | 14 | 24 | 0.738 | 3,596  | 8,893 | 0.712 |
| chr6 | 42231372 | T | C | 39 | 3  | 0  | 0.036 | 12,940 | 34    | 0.003 |
| chr6 | 42249304 | A | G | 39 | 2  | 1  | 0.048 | 2,914  | 204   | 0.065 |
| chr6 | 42254276 | G | C | 32 | 10 | 0  | 0.119 | 3,595  | 437   | 0.108 |
| chr6 | 42259213 | C | T | 23 | 14 | 5  | 0.286 | 5,258  | 1,964 | 0.272 |
| chr6 | 42260028 | C | T | 34 | 8  | 0  | 0.095 | 14     | 3     | 0.176 |
| chr6 | 42260080 | T | C | 41 | 1  | 0  | 0.012 |        |       |       |
| chr6 | 42260102 | C | T | 41 | 1  | 0  | 0.012 | 8,741  | 97    | 0.011 |
| chr6 | 42260311 | T | C | 35 | 7  | 0  | 0.083 | 16,737 | 2,230 | 0.118 |
| chr6 | 42260688 | T | C | 39 | 3  | 0  | 0.036 | 13,247 | 721   | 0.052 |
| chr6 | 42261388 | C | T | 41 | 1  | 0  | 0.012 | 6,214  | 137   | 0.022 |
| chr6 | 42270553 | A | G | 3  | 6  | 33 | 0.857 | 811    | 4,512 | 0.848 |
| chr6 | 42773010 | G | T | 29 | 10 | 3  | 0.190 | 3,473  | 971   | 0.218 |
| chr6 | 42773249 | G | A | 4  | 20 | 18 | 0.667 | 1,391  | 2,852 | 0.672 |
| chr6 | 42773468 | C | T | 5  | 17 | 20 | 0.679 | 2,021  | 3,858 | 0.656 |
| chr6 | 42797733 | A | G | 10 | 19 | 13 | 0.536 | 1,000  | 944   | 0.486 |
| chr6 | 72946121 | A | G | 40 | 2  | 0  | 0.024 | 5,809  | 174   | 0.029 |
| chr6 | 73008877 | C | T | 40 | 2  | 0  | 0.024 | 3,986  | 6     | 0.002 |
| chr6 | 73008879 | T | A | 40 | 2  | 0  | 0.024 | 3,973  | 1     | 0.000 |
| chr6 | 73027854 | A | G | 41 | 1  | 0  | 0.012 | 5,427  | 38    | 0.007 |
| chr6 | 73027939 | A | T | 9  | 13 | 20 | 0.631 | 2,217  | 3,434 | 0.608 |
| chr6 | 73028029 | A | G | 41 | 1  | 0  | 0.012 | 5,896  | 36    | 0.006 |
| chr6 | 73028054 | A | G | 41 | 1  | 0  | 0.012 | 6,069  | 211   | 0.034 |
| chr6 | 73028752 | A | G | 40 | 2  | 0  | 0.024 | 786    | 334   | 0.298 |
| chr6 | 73040844 | C | T | 39 | 3  | 0  | 0.036 | 19,971 | 1,398 | 0.065 |
| chr6 | 73040935 | A | T | 41 | 1  | 0  | 0.012 | 17,031 | 84    | 0.005 |
| chr6 | 73079896 | A | T | 41 | 1  | 0  | 0.012 | 2,470  | 13    | 0.005 |
| chr6 | 73156885 | C | T | 39 | 3  | 0  | 0.036 | 3,247  | 105   | 0.031 |
| chr6 | 73159245 | T | A | 41 | 1  | 0  | 0.012 | 7,507  | 20    | 0.003 |
| chr6 | 73165326 | A | T | 41 | 1  | 0  | 0.012 |        |       |       |
| chr6 | 73167420 | A | G | 41 | 1  | 0  | 0.012 | 2,398  | 29    | 0.012 |
| chr6 | 73168175 | A | G | 17 | 19 | 6  | 0.369 | 1,640  | 1,440 | 0.468 |
| chr6 | 73168213 | A | G | 38 | 4  | 0  | 0.048 | 5,005  | 178   | 0.034 |
| chr6 | 80251270 | G | A | 19 | 15 | 8  | 0.369 | 792    | 434   | 0.354 |
| chr6 | 80251336 | G | T | 41 | 1  | 0  | 0.012 |        |       |       |
| chr6 | 80251337 | T | A | 41 | 1  | 0  | 0.012 | 1,340  | 1     | 0.001 |
| chr6 | 80252396 | T | G | 39 | 3  | 0  | 0.036 | 4,032  | 206   | 0.049 |
| chr6 | 80253217 | T | C | 20 | 21 | 1  | 0.274 | 2,160  | 1,893 | 0.467 |
| chr6 | 80253567 | C | T | 19 | 15 | 8  | 0.369 | 2,211  | 1,619 | 0.423 |
| chr6 | 80258948 | G | C | 41 | 1  | 0  | 0.012 | 10,937 | 103   | 0.009 |

|      |           |   |   |    |    |    |       |        |        |       |
|------|-----------|---|---|----|----|----|-------|--------|--------|-------|
| chr6 | 80259054  | A | T | 41 | 1  | 0  | 0.012 | 15,786 | 8      | 0.001 |
| chr6 | 80259055  | T | A | 41 | 1  | 0  | 0.012 | 15,916 | 17     | 0.001 |
| chr6 | 80260142  | T | G | 36 | 6  | 0  | 0.071 | 7,754  | 2,237  | 0.224 |
| chr6 | 80285254  | T | G | 31 | 11 | 0  | 0.131 | 3,591  | 1,033  | 0.223 |
| chr6 | 80285260  | A | G | 2  | 15 | 25 | 0.774 | 1,003  | 3,718  | 0.788 |
| chr6 | 80285392  | T | C | 3  | 14 | 25 | 0.762 | 1,990  | 5,982  | 0.750 |
| chr6 | 80438306  | T | C | 34 | 7  | 1  | 0.107 | 2,668  | 456    | 0.146 |
| chr6 | 80438328  | T | C | 37 | 4  | 1  | 0.071 | 2,841  | 262    | 0.084 |
| chr6 | 80565391  | G | T | 27 | 12 | 3  | 0.214 | 6,541  | 2,774  | 0.298 |
| chr7 | 23112362  | G | C | 20 | 16 | 6  | 0.333 | 7,537  | 5,648  | 0.428 |
| chr7 | 23130000  | A | T | 41 | 1  | 0  | 0.012 | 4,719  | 1      | 0.000 |
| chr7 | 33100951  | G | C | 40 | 1  | 1  | 0.036 | 3,672  | 165    | 0.043 |
| chr7 | 33105400  | A | T | 13 | 17 | 12 | 0.488 | 1,516  | 1,439  | 0.487 |
| chr7 | 127821632 | C | G | 41 | 1  | 0  | 0.012 | 4,268  | 14     | 0.003 |
| chr7 | 127822124 | G | A | 32 | 4  | 6  | 0.190 | 191    | 6,108  | 0.970 |
| chr7 | 127824076 | C | A | 37 | 5  | 0  | 0.060 | 11,279 | 17     | 0.002 |
| chr7 | 127825791 | C | G | 33 | 8  | 1  | 0.119 | 6,162  | 1,873  | 0.233 |
| chr7 | 127828215 | G | T | 41 | 1  | 0  | 0.012 | 21,637 | 678    | 0.030 |
| chr7 | 138469985 | C | T | 41 | 1  | 0  | 0.012 | 2,728  | 25     | 0.009 |
| chr7 | 138475414 | A | G | 41 | 1  | 0  | 0.012 | 5,348  | 74     | 0.014 |
| chr7 | 138483476 | T | C | 40 | 2  | 0  | 0.024 | 1,995  | 57     | 0.028 |
| chr7 | 138483756 | T | A | 41 | 1  | 0  | 0.012 |        |        |       |
| chr7 | 138500514 | C | T | 41 | 1  | 0  | 0.012 | 4,741  | 61     | 0.013 |
| chr7 | 138524583 | T | C | 39 | 3  | 0  | 0.036 | 2,423  | 115    | 0.045 |
| chr8 | 1716146   | C | A | 36 | 6  | 0  | 0.071 | 3,392  | 6      | 0.002 |
| chr8 | 1716624   | C | T | 5  | 9  | 28 | 0.774 | 3,374  | 11,738 | 0.777 |
| chr8 | 1716627   | C | T | 39 | 3  | 0  | 0.036 | 13,885 | 579    | 0.040 |
| chr8 | 1716826   | G | A | 41 | 1  | 0  | 0.012 |        |        |       |
| chr8 | 1716921   | A | G | 14 | 11 | 17 | 0.536 |        |        |       |
| chr8 | 1718411   | T | G | 40 | 2  | 0  | 0.024 | 2,483  | 34     | 0.014 |
| chr8 | 1718909   | A | T | 41 | 1  | 0  | 0.012 | 2,917  | 333    | 0.102 |
| chr8 | 1718932   | A | G | 41 | 1  | 0  | 0.012 | 4,888  | 77     | 0.016 |
| chr8 | 1718936   | C | T | 41 | 1  | 0  | 0.012 | 5,070  | 47     | 0.009 |
| chr8 | 1720675   | C | T | 41 | 1  | 0  | 0.012 | 15,018 | 486    | 0.031 |
| chr8 | 1720752   | C | T | 41 | 1  | 0  | 0.012 | 8,855  | 166    | 0.018 |
| chr8 | 1720776   | C | T | 41 | 1  | 0  | 0.012 | 6,579  | 82     | 0.012 |
| chr8 | 10501354  | A | C | 6  | 11 | 25 | 0.726 | 2,423  | 7,556  | 0.757 |
| chr8 | 10501371  | A | T | 41 | 1  | 0  | 0.012 | 9,546  | 152    | 0.016 |
| chr8 | 10501571  | G | A | 36 | 5  | 1  | 0.083 | 6,738  | 758    | 0.101 |
| chr8 | 10501589  | C | G | 36 | 5  | 1  | 0.083 | 5,714  | 604    | 0.096 |
| chr8 | 10502014  | T | C | 38 | 4  | 0  | 0.048 | 6,604  | 295    | 0.043 |
| chr8 | 10502102  | A | T | 41 | 1  | 0  | 0.012 | 2,607  | 36     | 0.014 |
| chr8 | 10502165  | C | T | 25 | 13 | 4  | 0.250 | 2,421  | 949    | 0.282 |
| chr8 | 10502206  | G | C | 41 | 1  | 0  | 0.012 | 3,112  | 22     | 0.007 |
| chr8 | 10502295  | T | C | 12 | 20 | 10 | 0.476 | 4,746  | 4,758  | 0.501 |
| chr8 | 10503892  | G | A | 26 | 13 | 3  | 0.226 | 4,616  | 3,282  | 0.416 |

|      |          |   |   |    |    |    |       |        |       |       |
|------|----------|---|---|----|----|----|-------|--------|-------|-------|
| chr8 | 10504534 | G | C | 26 | 11 | 5  | 0.250 | 2,893  | 1,085 | 0.273 |
| chr8 | 10505057 | G | C | 40 | 2  | 0  | 0.024 | 2,719  | 314   | 0.104 |
| chr8 | 10506643 | A | G | 17 | 8  | 17 | 0.500 | 649    | 836   | 0.563 |
| chr8 | 10507478 | C | T | 15 | 15 | 12 | 0.464 | 522    | 826   | 0.613 |
| chr8 | 10508325 | A | G | 9  | 7  | 26 | 0.702 | 657    | 1,598 | 0.709 |
| chr8 | 10508351 | C | T | 0  | 0  | 42 | 1.000 | 5      | 1,755 | 0.997 |
| chr8 | 10516155 | C | T | 29 | 11 | 2  | 0.179 | 7,245  | 1,511 | 0.173 |
| chr8 | 10516227 | A | G | 41 | 1  | 0  | 0.012 | 3,637  | 87    | 0.023 |
| chr8 | 10516296 | C | G | 41 | 1  | 0  | 0.012 |        |       |       |
| chr8 | 10516307 | A | G | 2  | 3  | 37 | 0.917 | 50     | 122   | 0.709 |
| chr8 | 10516394 | C | T | 9  | 22 | 11 | 0.524 |        |       |       |
| chr8 | 10517956 | G | A | 41 | 1  | 0  | 0.012 | 3,748  | 94    | 0.024 |
| chr8 | 10549921 | G | C | 7  | 12 | 23 | 0.690 | 907    | 1,715 | 0.654 |
| chr8 | 10549963 | C | T | 41 | 1  | 0  | 0.012 | 2,740  | 33    | 0.012 |
| chr8 | 55701444 | A | G | 41 | 1  | 0  | 0.012 | 7,541  | 85    | 0.011 |
| chr8 | 55702597 | A | G | 41 | 1  | 0  | 0.012 | 3,875  | 26    | 0.007 |
| chr8 | 55703504 | T | C | 41 | 1  | 0  | 0.012 | 4,524  | 51    | 0.011 |
| chr8 | 55703507 | A | G | 41 | 1  | 0  | 0.012 | 4,402  | 47    | 0.011 |
| chr8 | 55704170 | A | G | 20 | 17 | 5  | 0.321 | 2,738  | 1,517 | 0.357 |
| chr9 | 32531880 | G | C | 41 | 1  | 0  | 0.012 | 1,919  | 4     | 0.002 |
| chrX | 38029009 | A | G | 31 | 7  | 4  | 0.179 | 8,299  | 1,948 | 0.190 |
| chrX | 38029665 | T | C | 41 | 1  | 0  | 0.012 | 24,922 | 1,004 | 0.039 |
| chrX | 38029766 | C | T | 34 | 6  | 2  | 0.119 | 24,557 | 2,729 | 0.100 |
| chrX | 38029800 | G | T | 41 | 1  | 0  | 0.012 | 25,066 | 18    | 0.001 |
| chrX | 38029800 | G | A | 39 | 2  | 1  | 0.048 | 25,066 | 2,861 | 0.102 |
| chrX | 38029965 | A | T | 41 | 1  | 0  | 0.012 | 8,466  | 347   | 0.039 |
| chrX | 38031545 | G | A | 40 | 2  | 0  | 0.024 | 15,223 | 1,006 | 0.062 |
| chrX | 38035450 | T | C | 41 | 1  | 0  | 0.012 | 10,645 | 118   | 0.011 |
| chrX | 38041354 | T | C | 41 | 0  | 1  | 0.024 | 12,355 | 101   | 0.008 |
| chrX | 38041415 | A | G | 41 | 1  | 0  | 0.012 | 13,469 | 136   | 0.010 |
| chrX | 38041621 | C | T | 40 | 2  | 0  | 0.024 | 24,421 | 2,015 | 0.076 |
| chrX | 38048740 | C | G | 41 | 1  | 0  | 0.012 | 14,380 | 546   | 0.037 |
| chrX | 38067013 | T | G | 41 | 0  | 1  | 0.024 | 16,605 | 81    | 0.005 |
| chrX | 38067074 | T | C | 41 | 1  | 0  | 0.012 | 15,517 | 411   | 0.026 |
| chrX | 38067103 | C | T | 40 | 1  | 1  | 0.036 | 14,594 | 506   | 0.034 |
| chrX | 38067736 | C | T | 32 | 6  | 4  | 0.167 | 6,716  | 1,485 | 0.181 |
| chrX | 46604442 | C | G | 41 | 0  | 1  | 0.024 |        |       |       |
| chrX | 46604442 | C | T | 41 | 0  | 1  | 0.024 | 22,105 | 216   | 0.010 |
| chrX | 46624652 | T | A | 41 | 0  | 1  | 0.024 | 17,604 | 332   | 0.019 |
| chrX | 46625052 | A | G | 41 | 0  | 1  | 0.024 | 31,951 | 734   | 0.022 |
