# Supplementary material
Source: PubMed Central journal article supplement (PMC2734323)
Supplement: btp373_4.pdf [file btp373_4.pdf]

**Supp. Table 4.** Small (1-5 bp) indels detected in 454 and Illumina data

| VarScan Indel Prediction (Individual 454 Sequencing) |           |           |       |                                   |         | VarScan Indel (Illumina) |           |           |
|------------------------------------------------------|-----------|-----------|-------|-----------------------------------|---------|--------------------------|-----------|-----------|
| chrom                                                | chr_start | chr_stop  | indel | alleles_in_context                | samples | indel                    | ref_reads | var_reads |
| 1                                                    | 148582365 | 148582366 | DEL-2 | ATATATATAT [AT/--] GTATTCTTAC     | 9       |                          |           |           |
| 1                                                    | 154399536 | 154399537 | DEL-2 | ACACTGAGCA [CA/--] GTCTACACAT     | 7       | DEL-2                    | 13,029    | 1,456     |
| 1                                                    | 154413124 | 154413126 | DEL-3 | TCCCGTTGAC [CAG/---] GGTCAGTGGT   | 10      |                          |           |           |
| 1                                                    | 195564163 | 195564163 | DEL-1 | GTTACTTTTT [A/-] TTTCCTTGTA       | 2       | DEL-1                    | 2,680     | 189       |
| 1                                                    | 195663697 | 195663697 | DEL-1 | ACAATGCATC [T/-] CTCAATCCAG       | 5       | DEL-1                    | 465       | 1         |
| 1                                                    | 195675693 | 195675693 | DEL-1 | CGTTCATTTT [C/-] ATTTGCAGCC       | 15      | DEL-1                    | 6         | 1         |
| 3                                                    | 130735395 | 130735395 | INS-1 | TTTTTTTAAAG [-/T] AATAATTAAT      | 1       | INS-1                    | 9,290     | 473       |
| 4                                                    | 648798    | 648798    | DEL-1 | TGCCGGGCGG [G/-] CGGGAGCCTC       | 2       |                          |           |           |
| 4                                                    | 15591327  | 15591327  | INS-3 | TGTTTGGGGG [---/TTA] TTTTTTTTTT   | 1       | INS-2                    | 6,057     | 12        |
| 4                                                    | 15598289  | 15598289  | DEL-1 | CTTTTTTTTT [C/-] AACTTAAAGT       | 1       | DEL-1                    | 258       | 908       |
| 4                                                    | 15635866  | 15635868  | DEL-3 | AACTCCAAAA [AAC/---] CAAAAATATA   | 1       |                          |           |           |
| 4                                                    | 15686612  | 15686612  | DEL-1 | AACAGGGAGC [C/-] GAGTACGAGG       | 9       |                          |           |           |
| 6                                                    | 42772562  | 42772562  | DEL-1 | ACATCTTGA [T/-] CTGGTCTTCT        | 10      |                          |           |           |
| 6                                                    | 73029803  | 73029804  | DEL-2 | CCACACACCC [CT/--] GTTAAGTGA      | 3       | DEL-2                    | 2,043     | 32        |
| 6                                                    | 73029947  | 73029947  | INS-1 | TGCTATTTTC [-/T] AGCTGTTTCC       | 1       |                          |           |           |
| 6                                                    | 73030230  | 73030230  | DEL-1 | TCTACTAAAA [C/-] ACACACACAC       | 12      |                          |           |           |
| 6                                                    | 73167605  | 73167605  | INS-1 | TCGTTTCTTG [-/T] GTTTTGT          | 14      |                          |           |           |
| 6                                                    | 80251912  | 80251912  | DEL-1 | ATTAAGAAAA [C/-] TTTTAAATAT       | 1       | DEL-1                    | 630       | 2         |
| 6                                                    | 80258186  | 80258188  | DEL-3 | AAATTATTTT [TAA/---] AAAATTATTA   | 1       |                          |           |           |
| 6                                                    | 80259920  | 80259922  | DEL-3 | AAGTGCTAAA [GAT/---] AATATCAGAA   | 5       | DEL-3                    | 3,758     | 651       |
| 6                                                    | 80303712  | 80303712  | INS-1 | CAAAGAGCGG [-/G] TGCCTGGTTC       | 3       | INS-2                    | 9,270     | 299       |
| 7                                                    | 127819900 | 127819900 | INS-1 | GAAGGGCCAG [-/G] GGCAGGGCCA       | 1       | INS-1                    | 255       | 1         |
| 7                                                    | 138473047 | 138473047 | INS-4 | TGCCTGTTGT [----/TCGT] AGTAACCCAA | 5       |                          |           |           |
| 7                                                    | 138473082 | 138473082 | INS-1 | TTAAACAGAG [-/T] GTTACTATT        | 2       |                          |           |           |
| 7                                                    | 138475455 | 138475455 | INS-4 | TGAGTAACTA [----/ACTA] GTTTAAAGAG | 1       | INS-4                    | 6,032     | 101       |
| 7                                                    | 138477558 | 138477558 | INS-1 | AAAGCCGACT [-/A] CAAAACCGCC       | 1       | INS-1                    | 1,382     | 1         |
| 8                                                    | 1716996   | 1716996   | INS-3 | CATCTGGTGG [---/TGG] AAGTGGTACA   | 11      | INS-3                    | 6,409     | 5,614     |
| 8                                                    | 1717501   | 1717501   | INS-1 | AGCAATTTAG [-/T] AATGTTGTTA       | 1       | INS-2                    | 1,065     | 7         |
| 8                                                    | 1717555   | 1717555   | INS-2 | TGTGTGTGTG [--/TG] GTGTTTTGAT     | 3       |                          |           |           |

|    |           |           |       |                                     |    |       |        |       |
|----|-----------|-----------|-------|-------------------------------------|----|-------|--------|-------|
| 8  | 1721842   | 1721842   | DEL-1 | CCAGCCTTGT [C/-] ACAGATGCAT         | 8  |       |        |       |
| 8  | 10502760  | 10502760  | INS-1 | CCTCCTGGGC [-/G] TCTACATCTT         | 1  | INS-1 | 833    | 2     |
| 8  | 10503272  | 10503272  | INS-1 | GTCTCTGGCT [-/G] GGCCTCCTTT         | 1  | INS-2 | 1,245  | 2     |
| 8  | 10504027  | 10504029  | DEL-3 | CACTTTCTTC [CTC/---] ACGCAGGCCT     | 8  | DEL-3 | 2,609  | 392   |
| 8  | 10504289  | 10504289  | INS-3 | TGGAGCTTCT [---/TCT] GAGCTCTCTC     | 1  | INS-3 | 4,340  | 104   |
| 8  | 10504423  | 10504423  | DEL-1 | GGCAAGGTGG [G/-] CCAGGAAGGC         | 2  | DEL-1 | 435    | 1     |
| 8  | 10504989  | 10504991  | DEL-3 | CTCCTTCTGT [TTC/---] TTTAGTTTCC     | 2  | DEL-3 | 1,413  | 3     |
| 8  | 55700105  | 55700105  | INS-1 | TGAGTTTTCC [-/A] GGAAGAACAG         | 1  |       |        |       |
| 8  | 55704003  | 55704003  | DEL-1 | TTCCAGGAAA [G/-] CAAGTCTTTA         | 1  |       |        |       |
| 8  | 55705384  | 55705384  | DEL-1 | ATGTTTGAGG [G/-] TGAAAATCTT         | 1  |       |        |       |
| 9  | 32530648  | 32530652  | DEL-5 | ATTAAAACTA [TAAAG/-----] TATTTGTTCA | 1  | DEL-5 | 2,858  | 55    |
| 9  | 32531342  | 32531343  | DEL-2 | TTCCTTTTTTC [CT/--] TTTTATAACA      | 7  | DEL-1 | 1,652  | 5     |
| 9  | 139255631 | 139255631 | INS-3 | CGCCGCCGCC [---/GCC] TCATGAGGGA     | 1  | INS-3 | 4,717  | 66    |
| 11 | 61476043  | 61476043  | INS-1 | GGCCTGGGAA [-/G] GATGTGGCTG         | 1  |       |        |       |
| 12 | 107563035 | 107563035 | INS-1 | ATGATTTTTTA [-/T] CTCTGAAAAT        | 1  |       |        |       |
| 12 | 107563431 | 107563432 | DEL-2 | ATTTGAATAT [AA/--] GTCATTGCCA       | 1  | DEL-2 | 1,907  | 15    |
| 12 | 107572364 | 107572366 | DEL-3 | ATACATTTTT [TTA/---] AAAATAAATT     | 2  |       |        |       |
| 13 | 27495586  | 27495586  | INS-1 | CTTCTTCCAG [-/T] CTTTTTTGGT         | 1  |       |        |       |
| 13 | 27495595  | 27495596  | DEL-2 | GCCTTTTTTG [GT/--] TTTCATATTC       | 1  | DEL-1 | 6,826  | 19    |
| 13 | 27500227  | 27500230  | DEL-4 | AGAATTAATA [AGAG/-----] AGAGAGAGAG  | 2  |       |        |       |
| 13 | 27500230  | 27500230  | DEL-1 | ATTAAAAAGA [G/-] AGAGAGAGAG         | 1  | DEL-1 | 2,087  | 6     |
| 13 | 27500443  | 27500443  | INS-1 | AGAAAGGAGC [-/A] TTAATAATGT         | 1  |       |        |       |
| 13 | 27520573  | 27520573  | INS-2 | CATTTATAAA [--/CT] CCCTTTTCTG       | 1  | INS-1 | 482    | 1     |
| 13 | 27545488  | 27545488  | INS-1 | CCTCATCTCT [-/A] GAAAAAAAAA         | 1  | INS-1 | 5,552  | 6     |
| 14 | 20848567  | 20848569  | DEL-3 | AAATAATAAT [AAT/---] TTCTTTCTTC     | 12 | DEL-3 | 15,205 | 1,486 |
| 15 | 69890150  | 69890152  | DEL-3 | GGAGACCAGA [CCA/---] ACAGCTCTGA     | 8  |       |        |       |
| 15 | 69891469  | 69891469  | DEL-1 | GGGCGCAGCC [C/-] ACGGGGCCCC         | 1  |       |        |       |
| 17 | 1500662   | 1500662   | INS-1 | AAAACAAACC [-/A] GCCCCTGAAC         | 1  | INS-1 | 2,946  | 2     |
| 17 | 1501679   | 1501679   | INS-3 | CAGGCTCCAT [---/ACG] ACTCCCCATT     | 7  | INS-3 | 2,931  | 476   |
| 17 | 1509623   | 1509627   | DEL-5 | AGCTTCTAAG [AAACC/-----] ATGGGCATAA | 1  | DEL-5 | 16,746 | 55    |
| 17 | 1512237   | 1512237   | DEL-1 | CAGATGAGCC [A/-] GGGCGGGGA          | 1  | DEL-1 | 7,891  | 103   |
| 17 | 6271180   | 6271180   | DEL-1 | AACAGGACCC [T/-] GTGGCACATC         | 1  | DEL-1 | 15,693 | 132   |
| 17 | 6299508   | 6299508   | DEL-1 | CGGCGGGCGG [G/-] TCGGGCTGCT         | 1  | DEL-1 | 605    | 1     |

|    |          |          |       |                                   |    |       |       |       |
|----|----------|----------|-------|-----------------------------------|----|-------|-------|-------|
| 17 | 7848104  | 7848104  | DEL-1 | CGTGCTCACC [C/-] TCACGCGCCA       | 1  |       |       |       |
| 17 | 55591580 | 55591580 | DEL-1 | GCTCACTTCT [G/-] CACGCAGCCT       | 9  | DEL-1 | 6,678 | 1,648 |
| 17 | 77111605 | 77111605 | DEL-1 | TAATTTTTTG [T/-] ATTTTTTAGA       | 1  |       |       |       |
| 17 | 77113687 | 77113687 | DEL-1 | GGCGTGGCCG [G/-] CGGGTAGCAC       | 1  | DEL-1 | 511   | 1     |
| 19 | 12797540 | 12797540 | DEL-1 | CTGCCGCTTC [C/-] ACTGCCACTC       | 1  | DEL-1 | 916   | 1     |
| 19 | 12798537 | 12798537 | INS-4 | AAATAAATAA [----/ATAA] TTGGTGGGGA | 1  | INS-4 | 6,186 | 802   |
| 19 | 53035164 | 53035164 | INS-2 | CCTTCTGACA [--/CA] CTCGGTGTTT     | 9  | INS-1 | 4,639 | 180   |
| 19 | 53035350 | 53035352 | DEL-3 | CTCCAAGAAG [AAG/---] TCAAACCAAA   | 19 | DEL-3 | 4,714 | 821   |
| 19 | 53037422 | 53037422 | DEL-1 | AGGCCGAGGC [G/-] GGTGGATCAC       | 1  |       |       |       |
| 19 | 53037952 | 53037952 | INS-2 | TGCAAACAAG [--/GG] CATAGAAACT     | 5  | INS-1 | 1,910 | 200   |
| 19 | 59319879 | 59319880 | DEL-2 | CCCTCCCCCG [GC/--] CCCCTGGAG      | 3  | DEL-1 | 914   | 6     |
| X  | 38013562 | 38013564 | DEL-3 | ACATATAAAA [ATA/---] TATTTTTTAT   | 1  |       |       |       |
| X  | 38035328 | 38035328 | DEL-1 | ATATTTTTTT [A/-] TATATATATA       | 1  | DEL-1 | 267   | 3     |
| X  | 38061644 | 38061644 | INS-1 | GTCACCCAC [-/C] TAAAAAGTCT        | 1  |       |       |       |
| X  | 46625353 | 46625355 | DEL-3 | ACATCACATA [TAG/---] CAGCTATTAT   | 10 |       |       |       |

---
